# Supplementary material
Source: MDPI journal article supplement (https://www.mdpi.com/2072-4292/12/11/1786)
Supplement: s1 [file s1]

Supplementary Material

# Satellite-Based Monitoring and Modeling of Ground Movements Caused by Water Rebound

Agnieszka A. Malinowska \*, Wojciech T. Witkowski, Artur Guzy and Ryszard Hejmanowski

Department of Mining Surveying and Environmental Engineering, AGH University of Science and Technology, 30-059 Kraków, Poland; wwitkow@agh.edu.pl (W.T.W); aguzy@agh.edu.pl (A.G.); hejman@agh.edu.pl (R.H.)

\* Correspondence: amalin@agh.edu.pl

Received: 25 April 2020; Accepted: 29 May 2020; Published: 1 June 2020

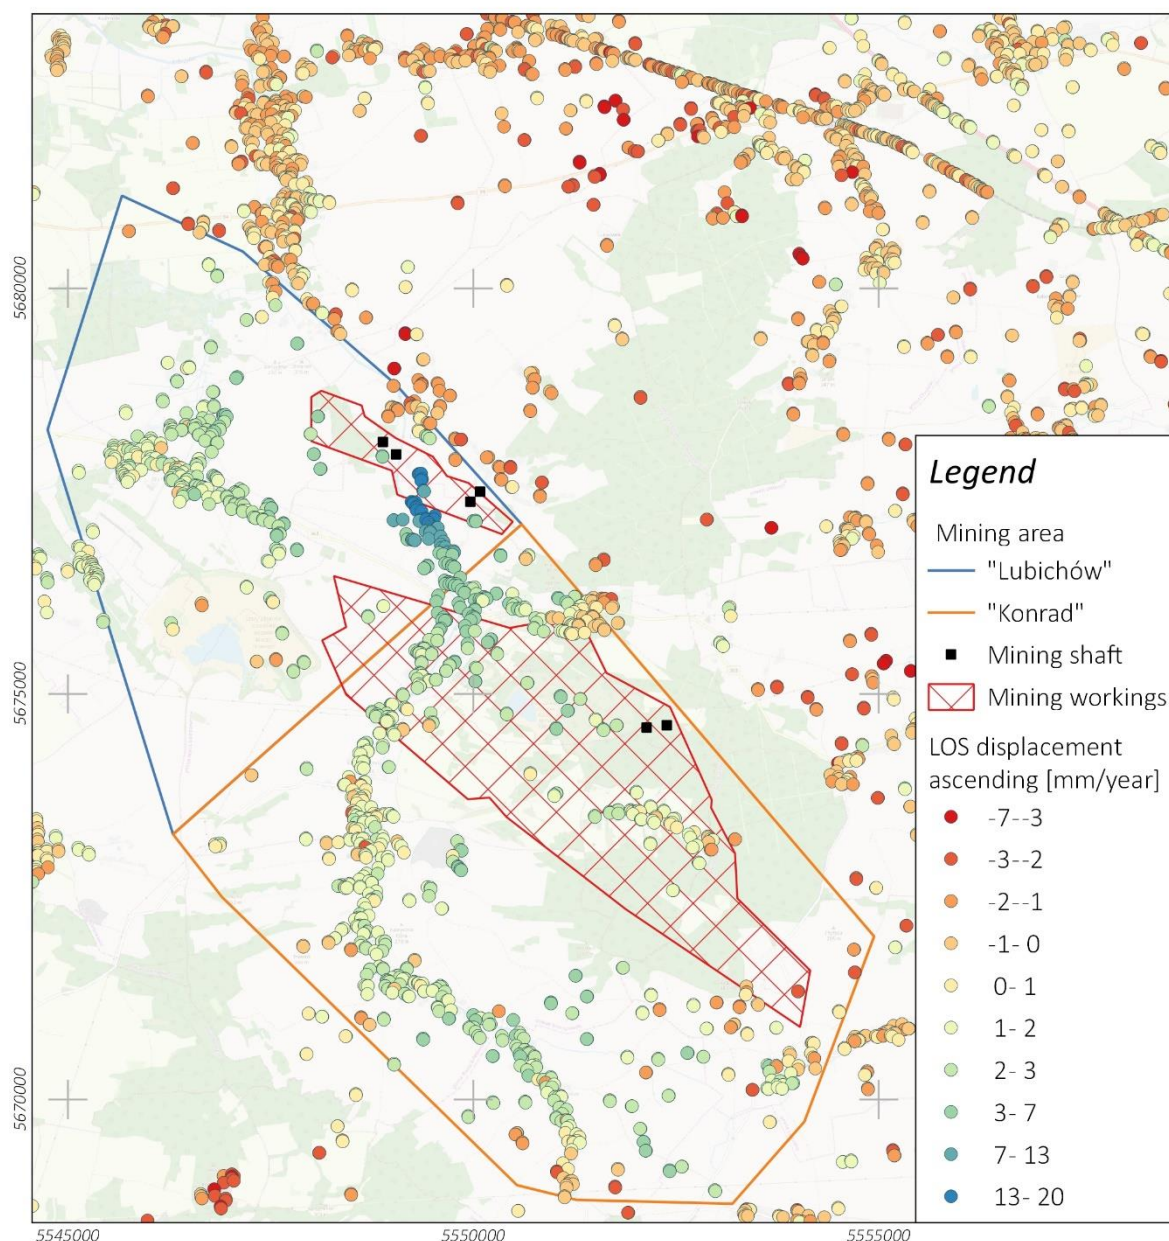

**Figure S1.** Line-of-Sight (LOS) displacements for ascending passes.

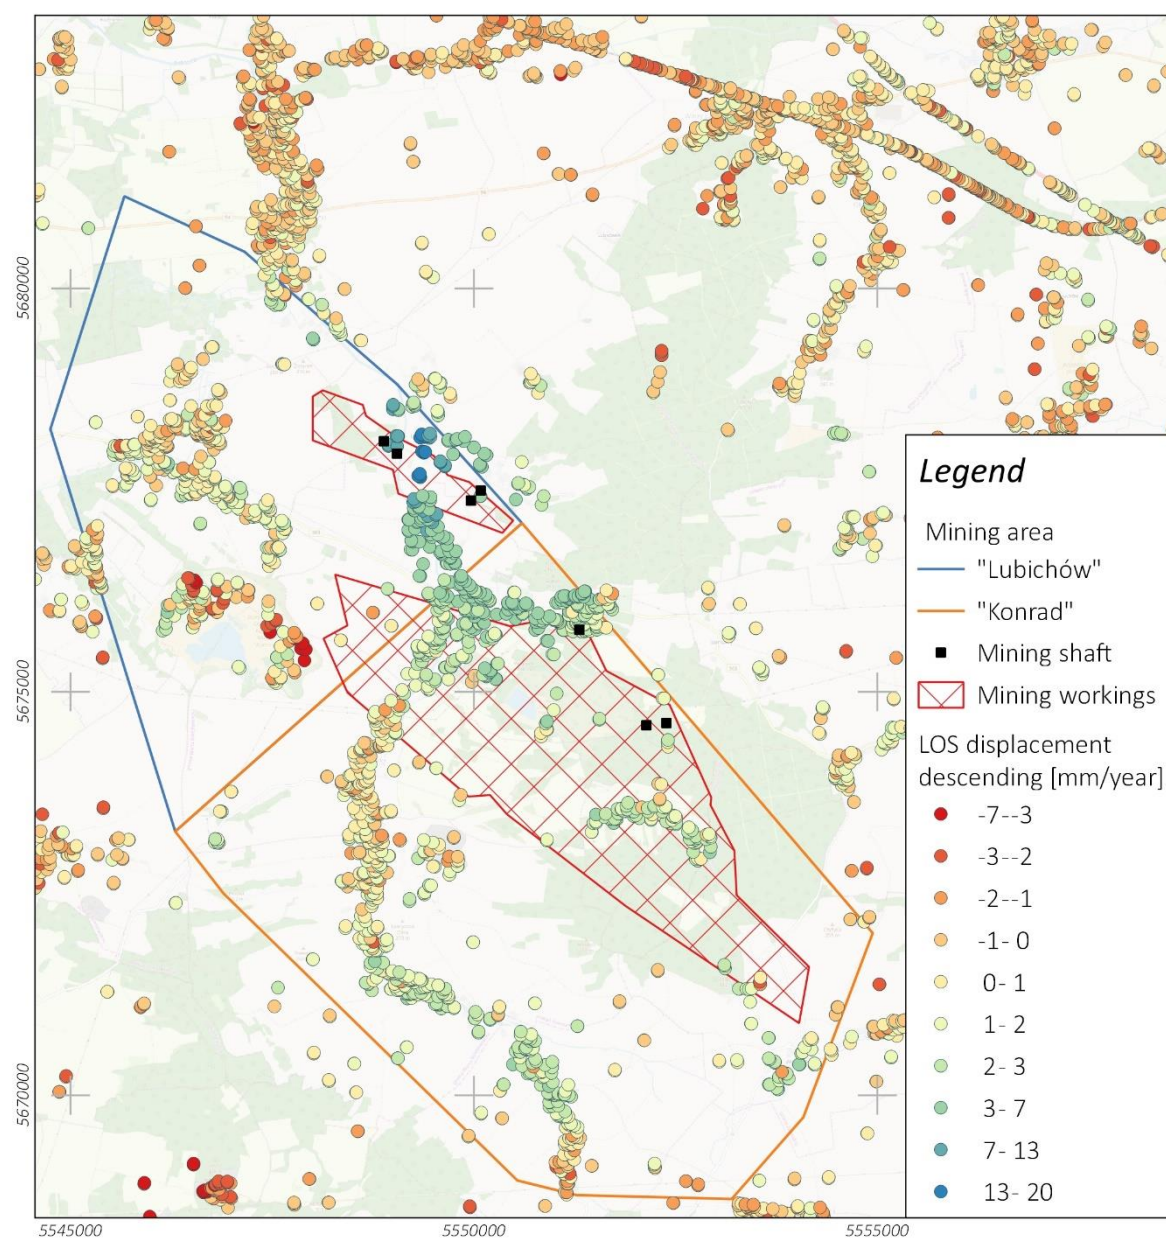

**Figure S2.** LOS displacements for descending passes.

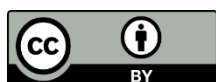

© 2020 by the authors. Submitted for possible open access publication under the terms and conditions of the Creative Commons Attribution (CC BY) license (<http://creativecommons.org/licenses/by/4.0/>).
